# Supplementary material for: Excessive Se on RuSe2 nanocrystals to accelerate water dissociation for the enhanced electrocatalytic hydrogen evolution reaction
Source: Royal Society of Chemistry journal article supplement (doi:10.1039/d0nr07111k), 2020-01-01
Supplement: d0nr07111k1.pdf [file d0nr07111k1.pdf]

## Supporting Information

### **Excessive Se on RuSe<sub>2</sub> nanocrystals to accelerate water dissociation for enhanced electrocatalytic hydrogen evolution reaction**

Kefeng Wang,<sup>a</sup> Bin Li,<sup>b</sup> Wei Wei,<sup>\*a</sup> Jingge Wang,<sup>c</sup> Qi Shen<sup>b</sup> and Peng Qu<sup>\*a, b</sup>

*<sup>a</sup> Henan Engineering Center of New Energy Battery Materials, Henan Key Laboratory of Biomolecular Recognition and Sensing, College of Chemistry and Chemical Engineering, Shangqiu Normal University, Shangqiu 476000, Henan, China*

*<sup>b</sup> College of Chemistry and Molecular Engineering, Zhengzhou University, Zhengzhou 450001, China*

*<sup>c</sup> School of Physics and Engineering, Henan University of Science and Technology, Luoyang 471023, China*

## Experimental Section

*Materials:* RuCl<sub>3</sub> and Se powder were purchased from Energy Chemical Ltd. (Shanghai, China). Hydrazine hydrate (85 wt%) and KOH were purchased from Aladdin Ltd. (Shanghai, China). Commercial 20% Pt/C, RuO<sub>2</sub> catalysts and Nafion ethanol solution (5 wt%, DuPont) were purchased from Shanghai Macklin Biochemical Co., Ltd. All chemical reagents used were of analytical grade and used without further purification. Carbon fiber paper (CFP) was bought from Shanghai Hesun Corp.

*Synthesis of Ru<sub>x</sub>Se:* Ru<sub>x</sub>Se nanocrystals were synthesized through a facial hydrothermal method. Typically, 0.06 g Se powder and 0.0518 g RuCl<sub>3</sub> were mixed in deionized water (35 mL). After vigorous stirring for 10 min, 2 mL hydrazine hydrate (85 wt%) was dropped into the above solution under constant stirring. The resulting solution was transferred into a 50 mL Teflon-lined autoclave, and the autoclave was sealed and maintained at 120 °C for 12 h. After naturally cooled to room temperature, the precipitate was collected and washed thoroughly with deionized water and ethanol, and finally dried in vacuum at 60 °C overnight. The obtained samples were further pyrolyzed at different temperature (300 °C, 400 °C, 500 °C and 600 °C) for 2 h in an Ar atmosphere to obtain Ru<sub>x</sub>Se nanocrystals.

*Material characterizations:* X-ray diffraction (XRD) patterns were recorded at room temperature on a Bruker D8 Advance X-ray diffractometer using a Cu K $\alpha$  radiation ( $\lambda=1.5416$  Å) with  $2\theta$  scan range between 10° and 80°. Transmission electron microscopy (TEM) images, high-resolution TEM (HRTEM) images, energy dispersive X-ray (EDX) elemental mappings and EDX spectra were collected using a FEI Tecnai G2 F20 field-emission transmission electron microscopy equipped with an EDX detector. X-ray photoelectron spectroscopy (XPS) measurements were carried out with a ThermoFisher K-Alpha X-ray photoelectron spectrometer with an Al K $\alpha$  source. All the binding energies were calibrated to the standard C 1s emission signal (284.8 eV) of the contaminant carbon during the measurement. Brunauer–

Emmett–Teller (BET) measurements were carried out using a Surface area and Porosity Analyzer (ASAP2020).

*Preparation of catalyst electrodes:* Different catalysts including 20% Pt/C and RuO<sub>2</sub> were loaded on carbon fiber paper (CFP) through a drop-casting method. Briefly, 10 mg of the catalyst were dispersed in 480 μL of water–ethanol solution at volume ratio of 250:230. Then 20 μL of Nafion solution (5 wt%, DuPont) was added. The obtained mixture was ultra-sonicated for 3 h to form a homogenous ink. Then 50 μL catalyst ink was dropped onto a piece of carbon fiber paper (CFP, 1 cm × 1cm) and left to dry at room temperature overnight. The catalyst loading was 1 mg cm<sup>-2</sup>.

*Electrochemical measurements:* All the electrochemical measurements were carried out with a CHI660E electrochemical analyzer using a standard three-electrode cell system. The catalyst electrode, Hg/HgO electrode and a graphite rod were used as the working electrode, reference electrode and counter electrode, respectively. A KOH aqueous solution (1 M) was used as the electrolyte during the whole measurement. Prior to the test, the electrolyte was purged with high-purity N<sub>2</sub> for at least 30 min to remove dissolved O<sub>2</sub>. Polarization curves were recorded by conducting linear sweep voltammetry (LSV) measurements with a potential window of -0.8 V~ -1.6 V vs Hg/HgO at a scan rate of 2 mV/s. All the potentials were calibrated with respect to a reversible hydrogen electrode (RHE) using  $E_{\text{RHE}} = E_{\text{Hg/HgO}} + 0.935$ . The calibration was performed using two pieces of Pt foil (1 cm×1cm) in a high-purity H<sub>2</sub>-saturated electrolyte. In order to reveal the intrinsic electrocatalytic behavior of the catalysts, 90% IR compensations were applied to all the polarization curves based on the ohmic resistance of the solution determined by electrochemical impedance spectroscopy (EIS). EIS tests were carried out with the frequency ranging from 100 mHz to 100 kHz and a 5 mV amplitude. The electrochemical stability test of the catalyst was conducted by continuously cyclic voltammetry (CV) measurement between -0.8 V~ -1.3 V (vs Hg/HgO) for 3000 cycles at a scan rate of 100 mV s<sup>-1</sup>, and the polarization curves before and after CV measurement were recorded.

Chronoamperometric measurement was conducted for 18 h at an overpotential of 45 mV to monitor the long-term i-t response for the HER test. The volume of H<sub>2</sub> produced under a constant current density at different time was measured using a gas chromatography.

*Computational Method:* All the density functional theory (DFT) calculations were performed by using Vienna Ab-initio Simulation Package<sup>1,2</sup>(VASP) under the Projected Augmented Wave<sup>3</sup>(PAW) method. The revised Perdew-Burke-Ernzerhof (RPBE) functional was used to describe the exchange and correlation effects, since it has been proved to provide useful trend in computing adsorption energies.<sup>4-6</sup> In all the calculations, the cutoff energy was set to be 500 eV. To mimic the Se-enriched environment, we added a Se dimer on the (210) surface of RuSe<sub>2</sub>. The Monkhorst-Pack grids<sup>7</sup> were set to be 6×3×1 for (210) surface, respectively. At least 18 Å vacuum layer was applied in z-direction of the slab models, preventing the slabs from vertical interactions.

The descriptor proposed by Norskov et al. was used to describe the HER activity on a given catalyst surface, where the free energy of hydrogen adsorption ( $\Delta G_{H^*}$ ) was considered as the key parameter determining the HER activity.<sup>8</sup> For HER in acidic solutions, it is a two-step process and involves only one reaction intermediate, the chemisorbed H atom. The free energy of the adsorbed hydrogen is defined as:

$$\Delta G_{H^*} = \Delta E_H + \Delta E_{ZPE} - T\Delta S_H$$

where  $\Delta E_H$  is the hydrogen binding energy,  $\Delta E_{ZPE}$  is the zero-point energy difference between adsorbed hydrogen and gaseous hydrogen, and  $T\Delta S$  is the corresponding entropy difference between these two states. According to previous studies, here we used a 0.24 eV value to represent the correction of zero-point energy and entropy of hydrogen state.

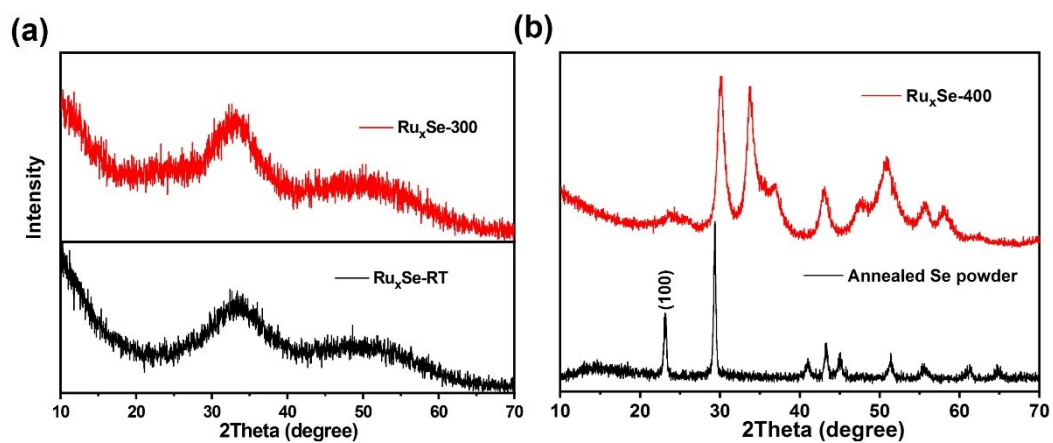

**Fig. S1** Comparison of XRD patterns of (a) Ru<sub>x</sub>Se-RT and Ru<sub>x</sub>Se-300 and (b) RuSe-400 and annealed Se powder.

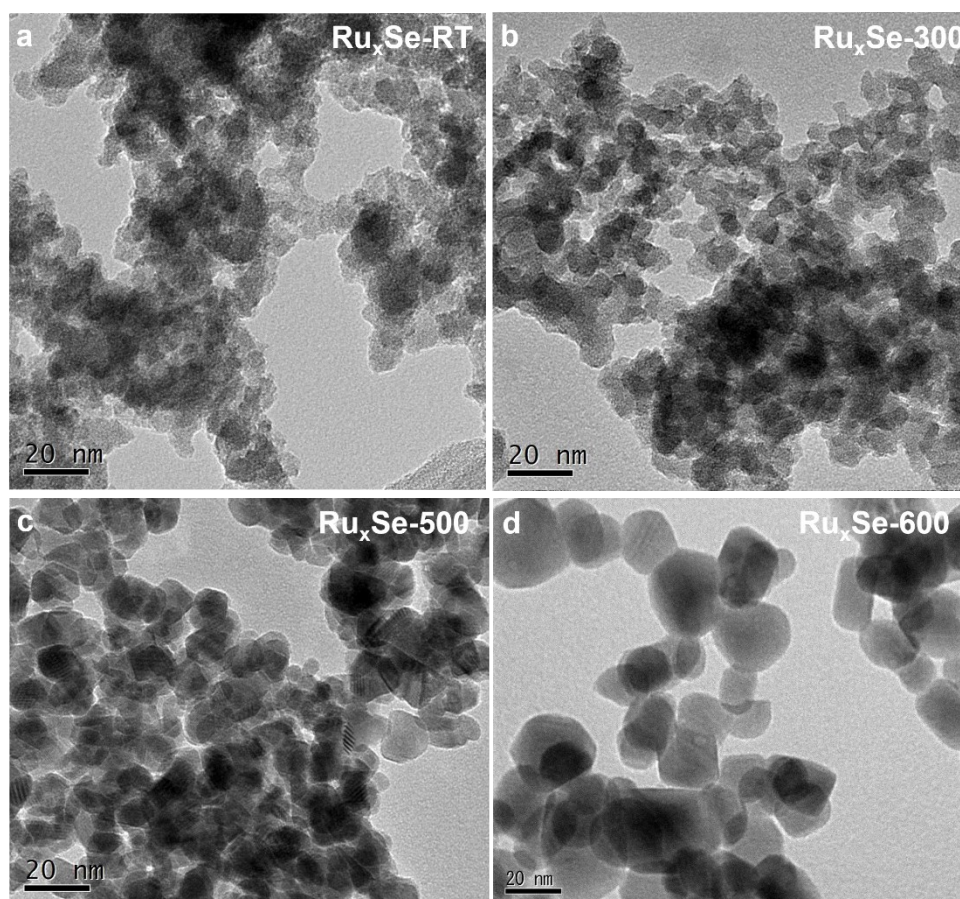

**Fig. S2** TEM images of the pristine Ru<sub>x</sub>Se (Ru<sub>x</sub>Se-RT) and the samples calcinated at different temperatures.

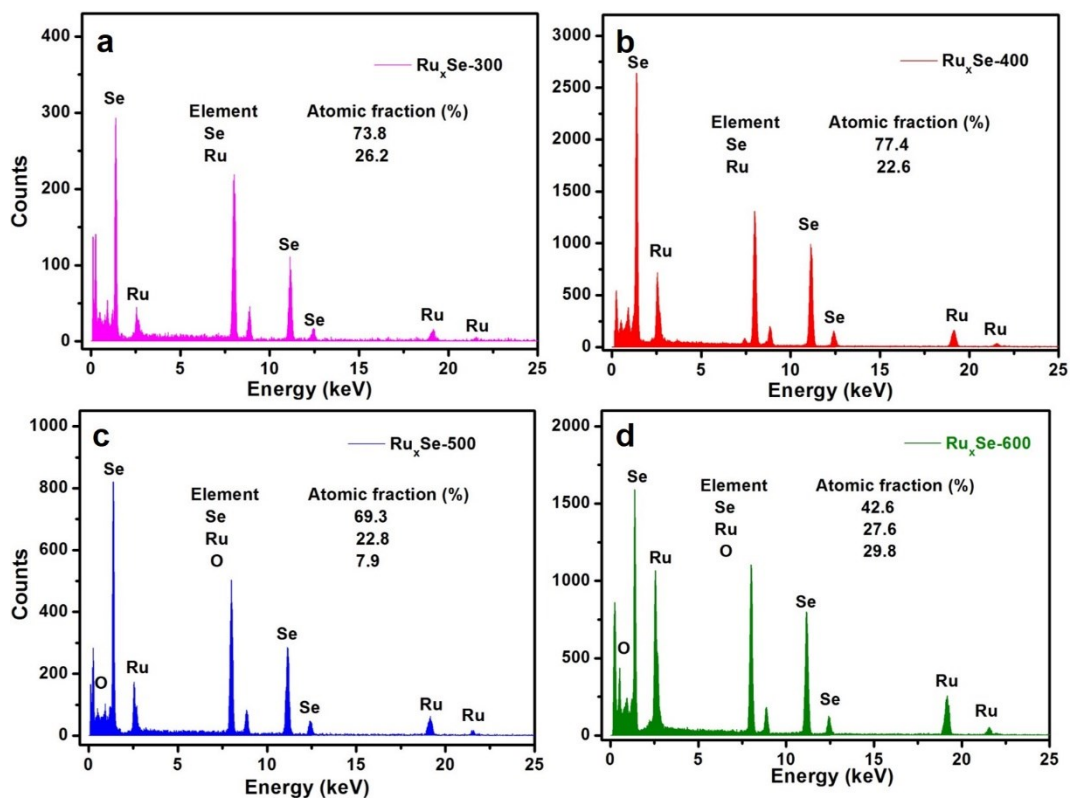

**Fig. S3** EDX spectra and the corresponding elemental composition of the  $Ru_xSe$  nanocrystals obtained at different temperature.

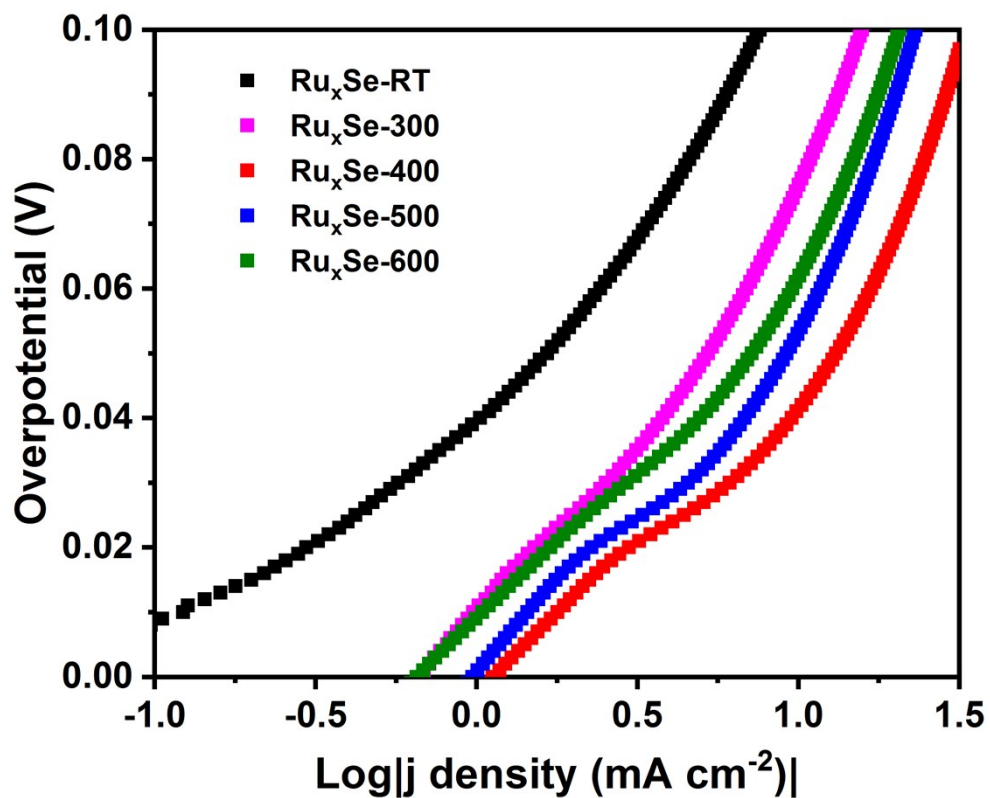

**Fig. S4** Tafel plots of  $Ru_xSe$  nanocrystals calcinated at different temperatures.

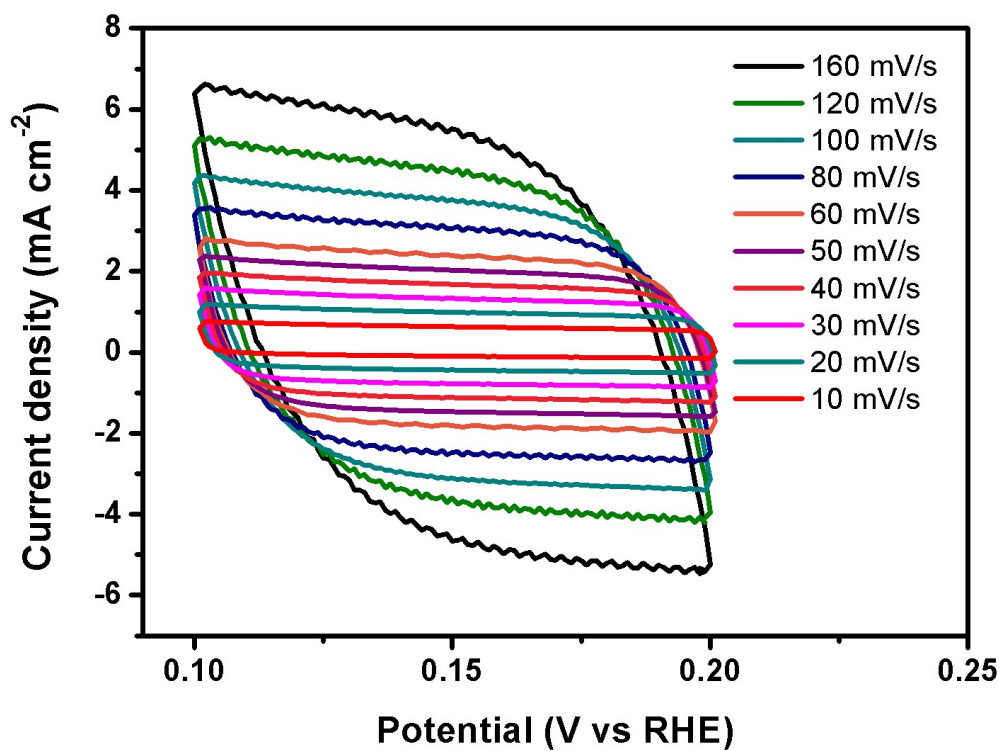

**Fig. S5** cyclic voltammograms of  $\text{Ru}_x\text{Se-400}$  at different scan rates ranging from 10 mV/s to 160 mV/s.

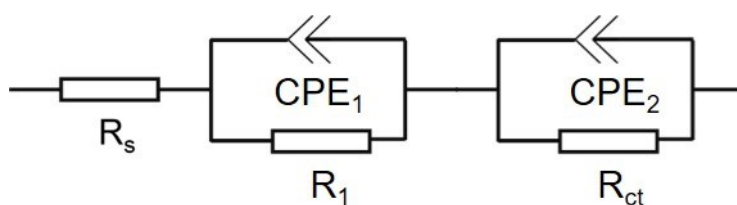

**Fig. S6** The equivalent circuit used to fit the Nyquist plots for different catalysts recorded at a bias voltage of -200 mV vs RHE.



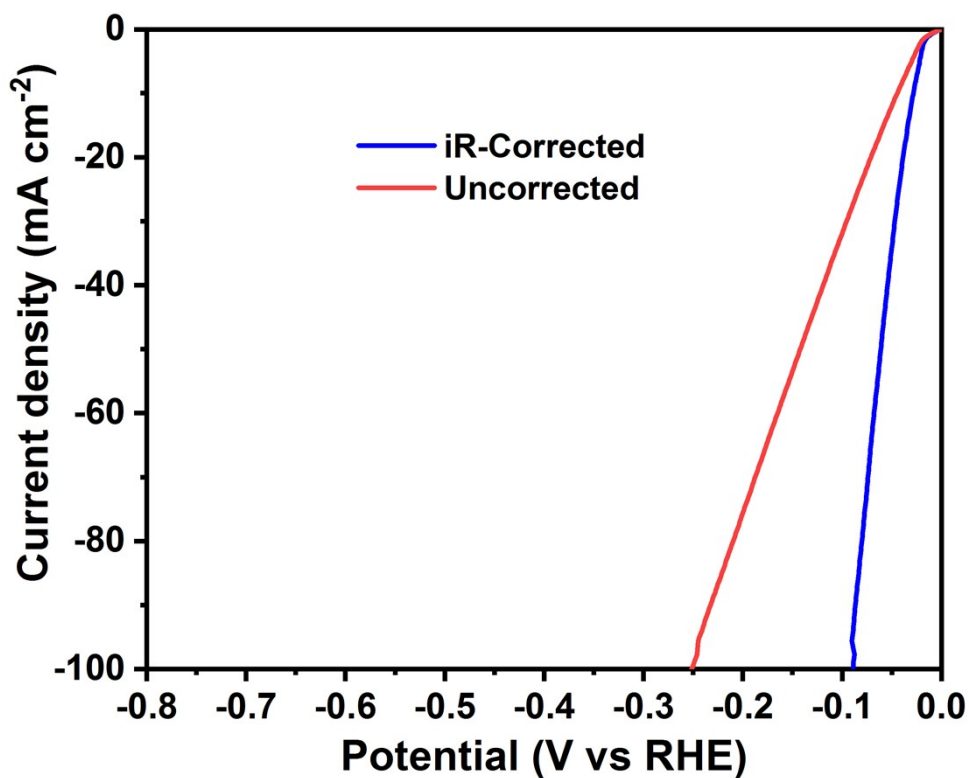

**Fig. S7** Polarization curves of Ru<sub>x</sub>Se-400 with and without IR-correction. The IR-correction was based on the resolution resistance (1.8 Ω) measured by EIS at an overpotential of 100 mV.

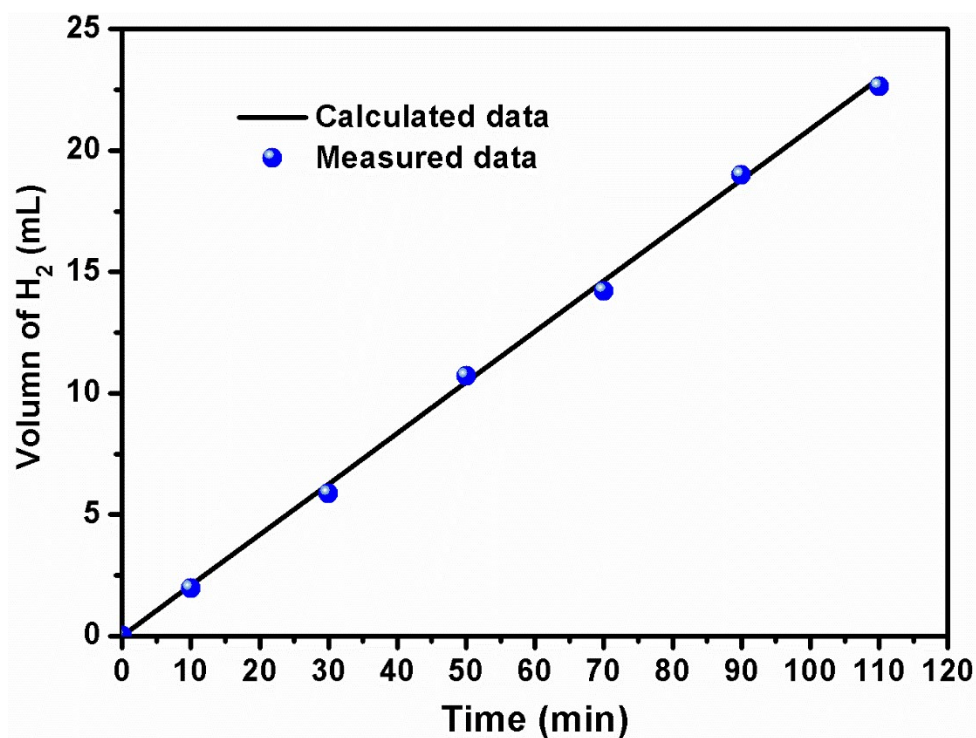



**Fig. S8** Experimentally measured H<sub>2</sub> production and theoretically calculated amount by operating HER under a constant current density of -20 mA cm<sup>-2</sup>

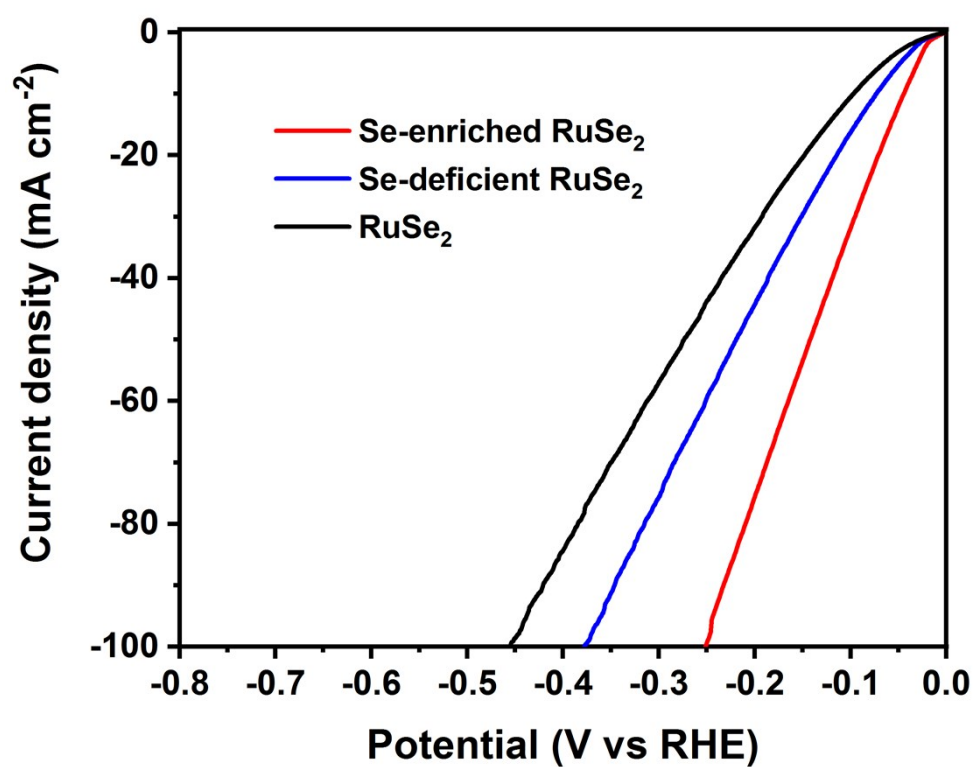

**Fig. S9** Comparison of HER performances of Se-enriched RuSe<sub>2</sub>, RuSe<sub>2</sub> and Se-deficient RuSe<sub>2</sub> nanocrystals.

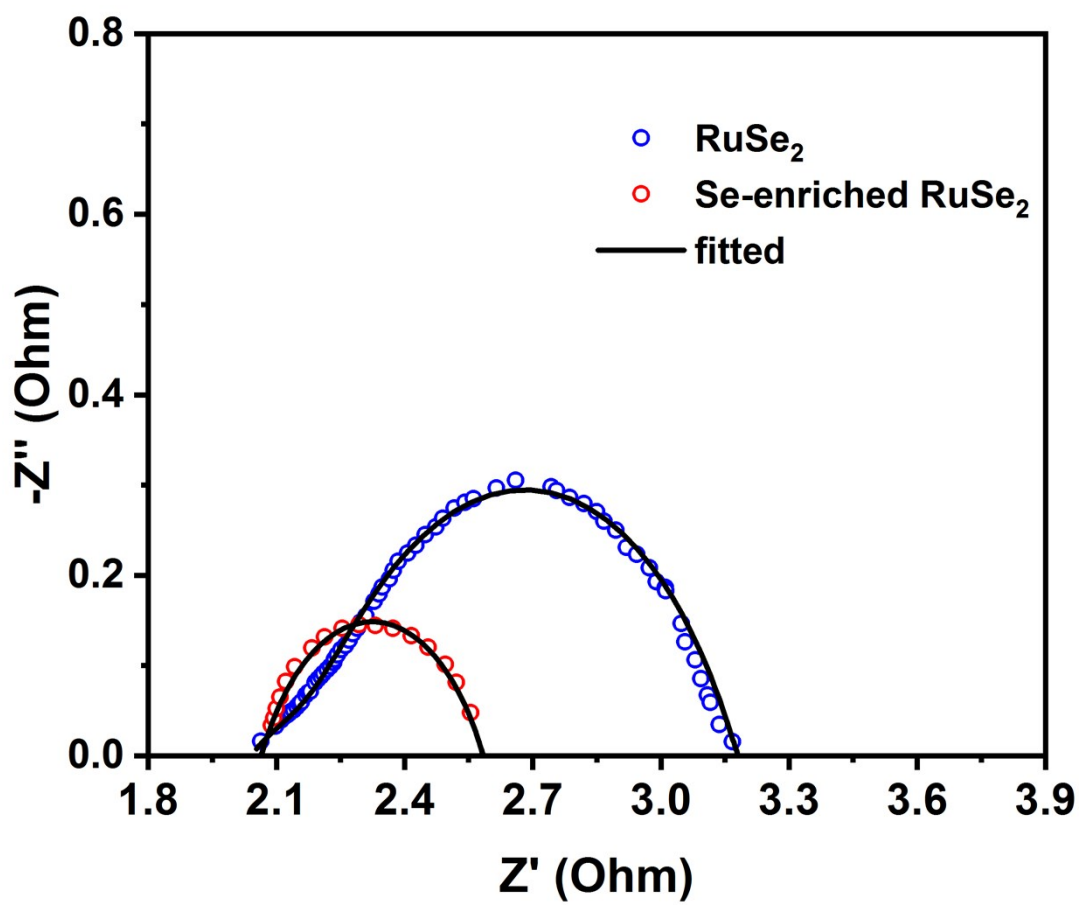

**Fig. S10** EIS spectra of Se-enriched RuSe<sub>2</sub> and RuSe<sub>2</sub> carried out at an overpotential of -200 mV

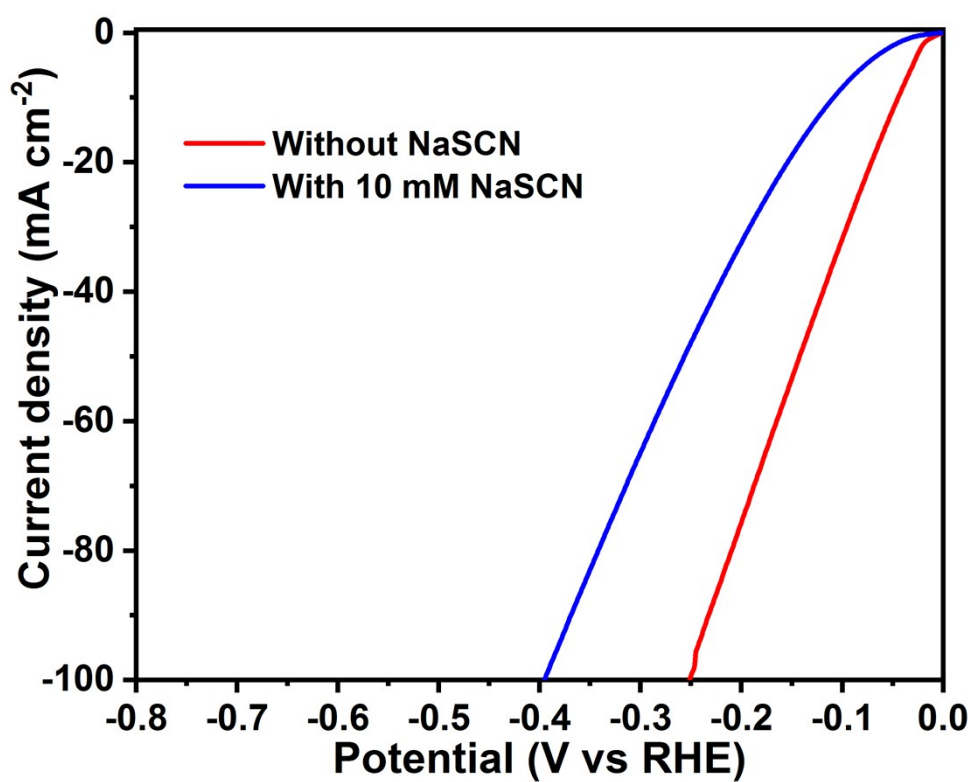

**Fig. S11** HER polarization curves of Ru<sub>x</sub>Se-400 in 1 M KOH electrolyte with and without 10 mM NaSCN.

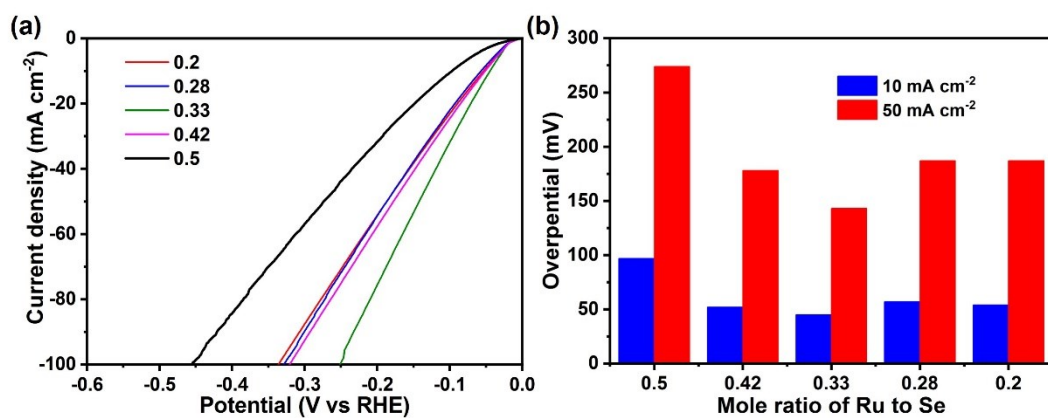

**Fig. S12** (a) HER polarization curves of Ru<sub>x</sub>Se-400 with different x values and (b) the overpotentials at 10 mA cm<sup>-2</sup> and 50 mA cm<sup>-2</sup> for different catalysts.

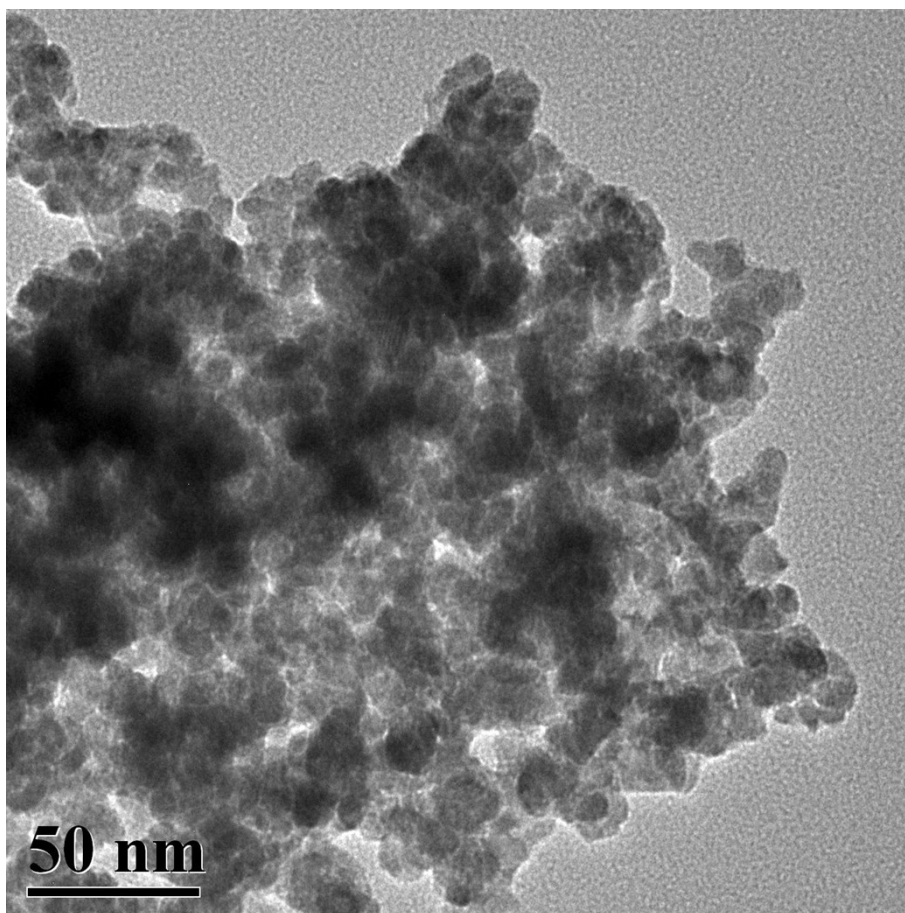

**Fig. S13** TEM image of  $\text{Ru}_x\text{Se-400}$  after long-time stability test.

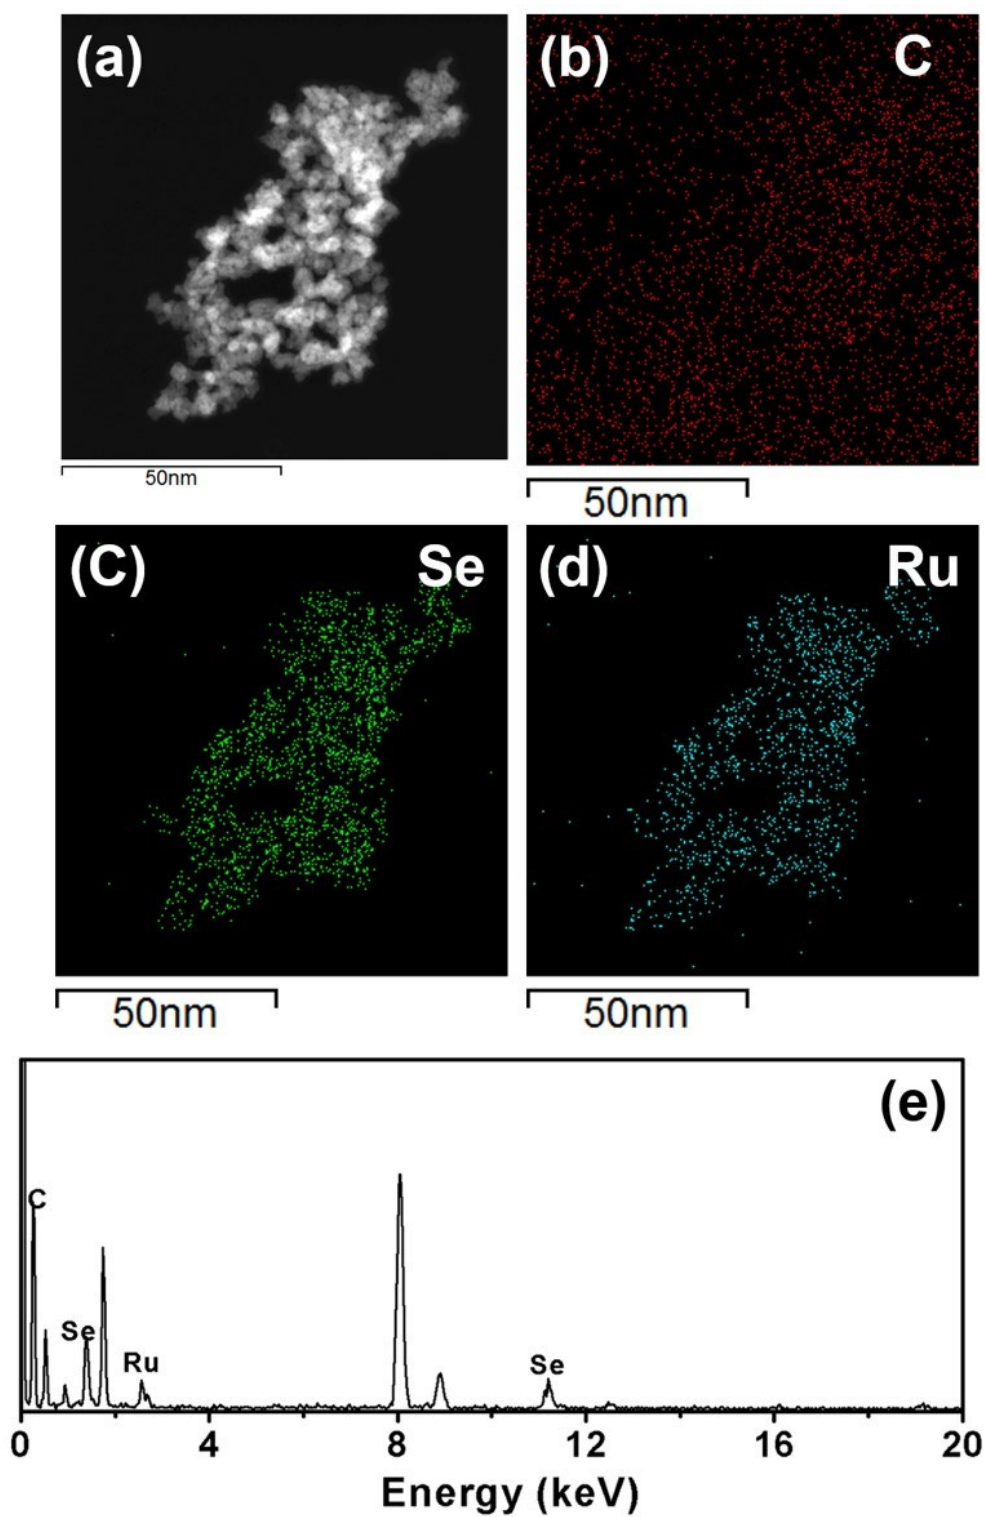

**Fig. S14** STEM (a) and elemental mapping images (b, c, d) and of EDX spectrum (e) of Ru<sub>x</sub>-400 after long-time stability test.

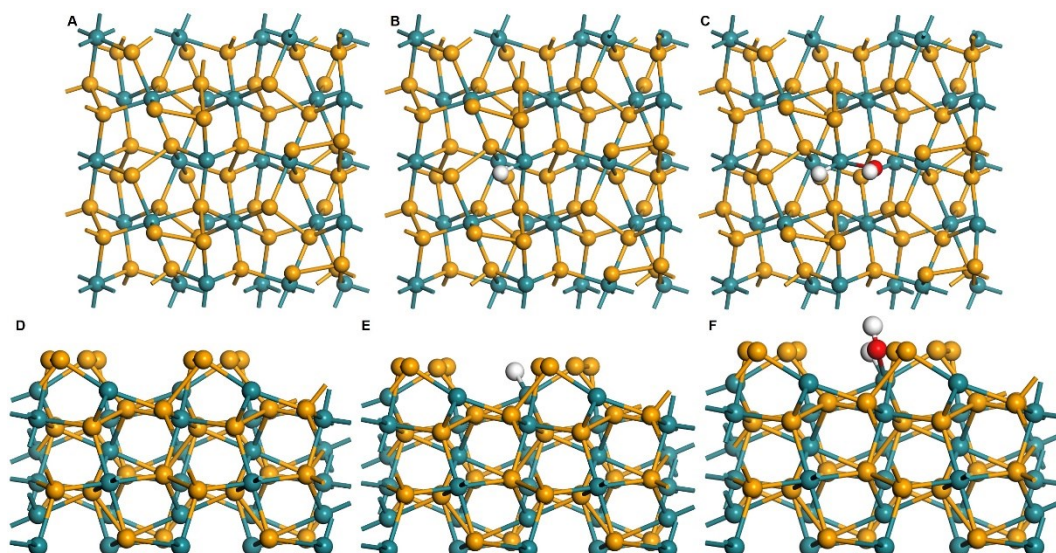

**Fig. S15** (A, B, C) Top views and (D, E, F) side views of calculated configurations for the original state,  $\text{H}^*$  and  $\text{H-OH}^*$  adsorption states on  $\text{RuSe}_2$  (210). The dark green, yellow, white and red spheres correspond to Ru, Se, O and H atoms.



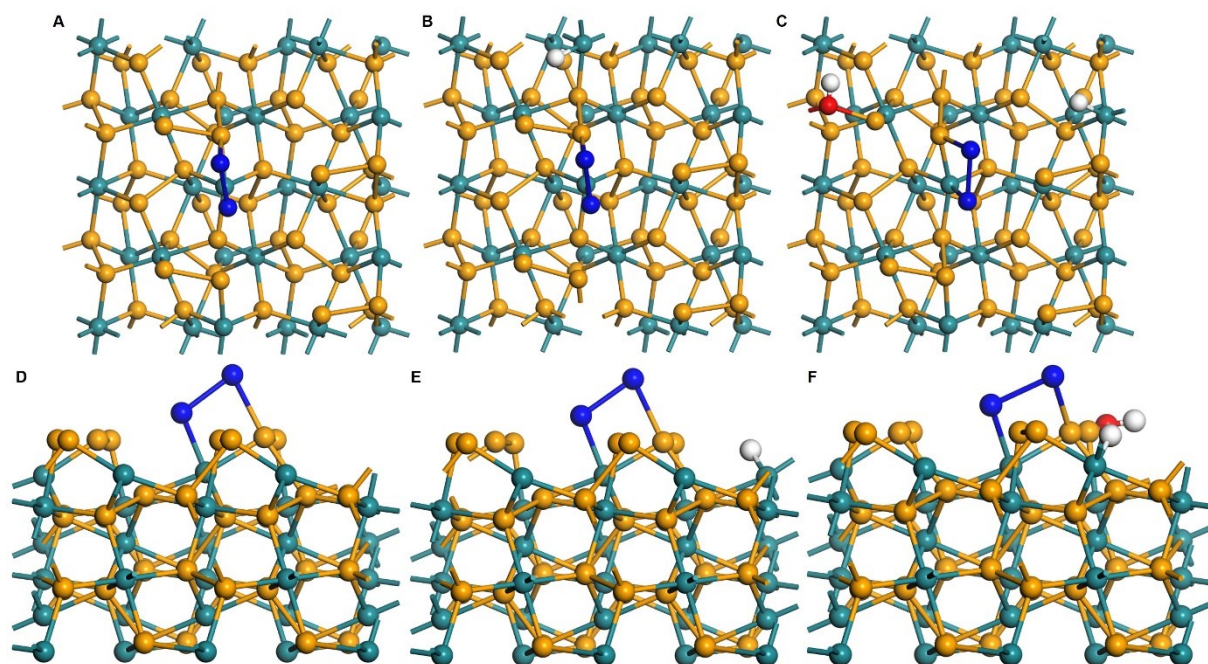

**Fig. S16** (A, B, C) Top views and (D, E, F) side views of calculated configurations for the original state, H\* and H-OH\* adsorption states on Se-enriched RuSe<sub>2</sub> (210). The dark green, yellow, white and red spheres correspond to Ru, Se, O and H atoms. While the blue spheres represent the surface adsorbed Se atoms.

**Table S1** The elemental contents in Ru<sub>x</sub>Se-T by ICP-AES.

| Catalyst               | Ru (wt.%) | Se (wt.%) |
|------------------------|-----------|-----------|
| Ru <sub>x</sub> Se-RT  | 32.09     | 68.22     |
| Ru <sub>x</sub> Se-300 | 28.47     | 67.97     |
| Ru <sub>x</sub> Se-400 | 27.85     | 63.50     |
| Ru <sub>x</sub> Se-500 | 32.85     | 60.77     |
| Ru <sub>x</sub> Se-600 | 30.75     | 48.43     |

**Table S2** The overpotential at the current density of 10 mA/cm<sup>2</sup> (with IR-compensation), and Tafel slopes for Ru-based HER electrocatalysts in alkaline media.

| Catalysts                                                                  | $\eta@10 \text{ mA cm}^{-2}$ (mV) | Tafel slope (mV dec <sup>-1</sup> ) | Ref.                                       |
|----------------------------------------------------------------------------|-----------------------------------|-------------------------------------|--------------------------------------------|
| Ru <sub>x</sub> Se-400                                                     | 28.5                              | 31.9                                | This work                                  |
| Ru-ZIF-900                                                                 | 51.6                              | 78.4                                | J. Mater. Chem. A, 2020, 8, 3203           |
| single Ru atoms anchored on MoS <sub>2</sub> nanosheets array              | 41                                | 114                                 | Appl. Catal., B, 2019, 249, 91             |
| Ru-NiFe-P nanosheets on 3D self-supported nickel foam                      | 44                                | 31.5                                | Appl. Catal., B, 2020, 263, 118324         |
| Ruthenium nanoparticles anchored on graphene hollow nanospheres            | 24.4                              | 34.8                                | Inorg. Chem., 2020, 59, 930                |
| ruthenium nanoparticles dispersed on N-doped carbon hollow nanospheres     | 28.8                              | 32.7                                | Chem. Commun., 2020, 56:6802               |
| Ru nanoparticles highly dispersed on carbon supports                       | 25                                | 33                                  | Adv. Energy Mater. 2018, 1801698           |
| Ru nanoparticles anchored on the graphene nanoplatelets                    | 22                                | 28                                  | Adv. Mater. 2018, 1803676                  |
| Ru/Cu-doped RuO <sub>2</sub> complex embedded in amorphous carbon skeleton | 28                                | 35                                  | Small 2018, 1803009                        |
| Cactus-like hollow Cu <sub>2-x</sub> S@Ru nanoplates                       | 82                                | 48                                  | Small 2017, 13, 1700052                    |
| hierarchical 4H/fcc Ru Nanotubes                                           | 23                                | 29.4                                | Small 2018, 1801090                        |
| Ru <sub>2</sub> P nanoparticle decorated P/N-doped carbon nanofibers       | 50                                | 66                                  | ACS Applied Energy Materials 2018, 1, 3143 |
| RuO <sub>2</sub> nanoparticles on nitrogen-doped Carbon Matrix             | 40                                | 47                                  | ACS Sustainable Chemistry &                |

|                                                                                              |    |    |                                                               |
|----------------------------------------------------------------------------------------------|----|----|---------------------------------------------------------------|
| Ru <sub>2</sub> P nanoparticles                                                              | 54 | 29 | Engineering<br>2018, 6, 11529<br>ChemSusChem<br>2018, 11, 1-7 |
| RuP <sub>2</sub> encapsulated in N, P dual-doped carbon                                      | 52 | 69 | <i>Angew. Chem. Int. Ed.</i> <b>2017</b> , 56, 11559.         |
| Ruthenium-cobalt nanoalloys encapsulated in nitrogen-doped graphene                          | 28 | 31 | <i>Nat. Commun.</i> , <b>2017</b> , 8, 14969.                 |
| Ru decorated with NiCoP                                                                      | 52 | 50 | <i>Chem. Commun.</i> , <b>2017</b> , 53, 13153.               |
| NiRu nanoalloys encapsulated in nitrogen-doped carbon                                        | 32 | 64 | <i>J. Mater. Chem. A</i> , <b>2018</b> , 6, 1376.             |
| RuP <sub>x</sub> nanoparticles encapsulated in uniform N,P-codoped hollow carbon nanospheres | 74 | 70 | <i>ChemSusChem</i> , <b>2018</b> , 11, 743.                   |
| Ru nanocrystal supported N-doped graphene                                                    | 40 | 76 | <i>Sustainable Energy Fuels</i> , <b>2017</b> , 1, 1028.      |
| Self-crosslinking carbon dots loaded ruthenium dots                                          | 29 | 57 | <i>Nano Energy</i> , <b>2019</b> , 65: 104023                 |
| Ru nanoparticles (Ru NPs) catalyst supported on carbon quantum dots                          | 65 | 63 | <i>Mater. Chem. Front.</i> , <b>2020</b> , 4: 277-284         |

**Table S3** HER activity of transition metal selenides in alkaline media.

| Catalysts                                                                                          | $\eta@10 \text{ mA cm}^{-2}$ (mV) | Tafel slope (mV dec <sup>-1</sup> ) | Ref.                                                                                              |
|----------------------------------------------------------------------------------------------------|-----------------------------------|-------------------------------------|---------------------------------------------------------------------------------------------------|
| Ni <sub>0.89</sub> Co <sub>0.11</sub> Se <sub>2</sub> mesoporous nanosheet networks on nickel foam | 85                                | 52                                  | <i>Adv. Mater.</i> , <b>2017</b> , 29, 1606521.                                                   |
| Co-doped NiSe <sub>2</sub> nanoparticles on Ti foil                                                | 64                                | 63                                  | <i>Nanoscale</i> , <b>2016</b> , 8, 3911.<br><i>Angew. Chem. Int. Ed.</i> <b>2015</b> , 54, 9351. |
| NiSe nanowire on nickel foam                                                                       | 96                                | 120                                 | <i>ACS Sustainable Chem. Eng.</i> , <b>2018</b> , 6, 2231.                                        |
| porous NiSe <sub>2</sub> nano-wrinkles on nickel foam                                              | 166                               | 92.3                                | <i>Adv. Mater.</i> <b>2016</b> , 28, 7527.                                                        |
| cubic phase CoSe <sub>2</sub> on carbon cloth                                                      | 190                               | 85                                  | <i>ACS Appl. Mater.</i>                                                                           |
| Co <sub>7</sub> Se <sub>8</sub>                                                                    | 472                               | 59.1                                |                                                                                                   |

|                                                                                    |     |       |                                                                                                          |
|------------------------------------------------------------------------------------|-----|-------|----------------------------------------------------------------------------------------------------------|
|                                                                                    |     |       | <i>Interfaces</i> ,<br><b>2016</b> , 8,<br>17292.<br><i>Chem.</i>                                        |
| porous NiSe <sub>2</sub> nanosheets on carbon paper                                | 184 | 77    | <i>Mater.</i> , <b>2015</b> ,<br>27, 5702.                                                               |
| NiSe nanoparticles decorated reduced graphene oxide-polyimide/carbon nanotube film | 270 | 61    | <i>Electrochim. Acta</i> , <b>2017</b> ,<br>243, 291.<br><i>Sci. Rep.</i> ,<br><b>2017</b> , 7,<br>2401. |
| Textured NiSe <sub>2</sub> Film                                                    | 170 | 107   | <i>ACS Appl. Mater. Interfaces</i> ,<br><b>2016</b> , 8,<br>5327.                                        |
| CoSe <sub>2</sub> Nanocrystals                                                     | 520 | 126   | <i>ACS Appl. Mater. Interfaces</i> ,<br><b>2017</b> , 9,<br>33766.                                       |
| NiSe <sub>2</sub> Nanocrystals                                                     | 540 | 139   | <i>Catal. Sci. Technol.</i> ,<br><b>2018</b> , 8, 128.                                                   |
| NiFe layered double hydroxide-NiSe                                                 | 163 | 70    | <i>J. Mater. Chem. A</i> ,<br><b>2017</b> , 5,<br>20588.                                                 |
| NiSe@CoP core-shell nanowire arrays                                                | 91  | 55    | <i>Chem. Commun.</i> ,<br><b>2015</b> , 51,<br>16683.                                                    |
| Mo, S-codoped NiSe/NF                                                              | 88  | 82    | <i>Adv. Mater. Interfaces</i><br><b>2018</b> , 5,<br>1701507                                             |
| amorphous CoSe film on a Ti mesh                                                   | 121 | 84    |                                                                                                          |
| NiSe/Ni <sub>3</sub> Se <sub>2</sub> /NF                                           | 92  | 101.2 |                                                                                                          |

## References

1. G. Kresse and J. Hafner, *Physical Review B* 1994, **49**, 14251.
2. G. Kresse and J. Furthmüller, *Physical Review B* 1996, **54**, 11169.
3. P. E. Blöchl, *Physical Review B* 1994, **50**, 17953.
4. J. P. Perdew, K. Burke and M. Ernzerhof, *Phys. Rev. Lett.* 1996, **77**, 3865.
5. Y. Zhang and W. Yang, *Phys. Rev. Lett.* 1998, **80**, 890.
6. B. Hammer, L. B. Hansen and J. K. Nørskov, *Physical Review B* 1999, **59**, 7413.
7. H. J. Monkhorst and J. D. Pack, *Physical review B* 1976, **13**, 5188.

8. J. K. Nørskov, T. Bligaard, A. Logadottir, J. Kitchin, J. G. Chen, S. Pandalov and U. Stimming, *J. Electrochem. Soc.* 2005, **152**, J23.
